# Supplementary material for: Some Considerations about the Anodic Limit of Ionic Liquids Obtained by Means of DFT Calculations
Source: MDPI journal article supplement (doi:10.3390/e25050793), 2023-05-12
Supplement: s1 [file s1]

# Some Considerations about the Anodic Limit of Ionic Liquids Obtained by Means of DFT Calculations

Annalisa Paolone <sup>1,\*</sup>, Simone Di Muzio <sup>1,2</sup>, Oriele Palumbo <sup>1</sup> and Sergio Brutti <sup>1,3</sup>

<sup>1</sup> Consiglio Nazionale delle Ricerche, Istituto dei Sistemi Complessi, Piazzale Aldo Moro 5, 00185 Rome, Italy; simone.dimuzio1@graduate.univaq.it (S.D.M.); oriele.palumbo@roma1.infn.it (O.P.); sergio.brutti@uniroma1.it (S.B.)

<sup>2</sup> Department of Physical and Chemical Sciences, University of L'Aquila, Via Vetoio, 67100 L'Aquila, Italy

<sup>3</sup> Department of Chemistry, Sapienza University of Rome, Piazzale Aldo Moro 5, 00185 Rome, Italy

\* Correspondence: annalisa.paolone@roma1.infn.it

**Citation:** Paolone, A.; Di Muzio, S.; Palumbo, O.; Brutti, S. Some Considerations about the Anodic Limit of Ionic Liquids Obtained by Means of DFT Calculations. *Entropy* **2023**, *25*, 793. <https://doi.org/10.3390/e25050793>

Academic Editor:  
Antonio M. Scarfone

Received: 4 April 2023  
Revised: 5 May 2023  
Accepted: 11 May 2023  
Published: 12 May 2023

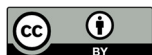

**Copyright:** © 2023 by the authors. Licensee MDPI, Basel, Switzerland. This article is an open access article distributed under the terms and conditions of the Creative Commons Attribution (CC BY) license (<https://creativecommons.org/licenses/by/4.0/>).

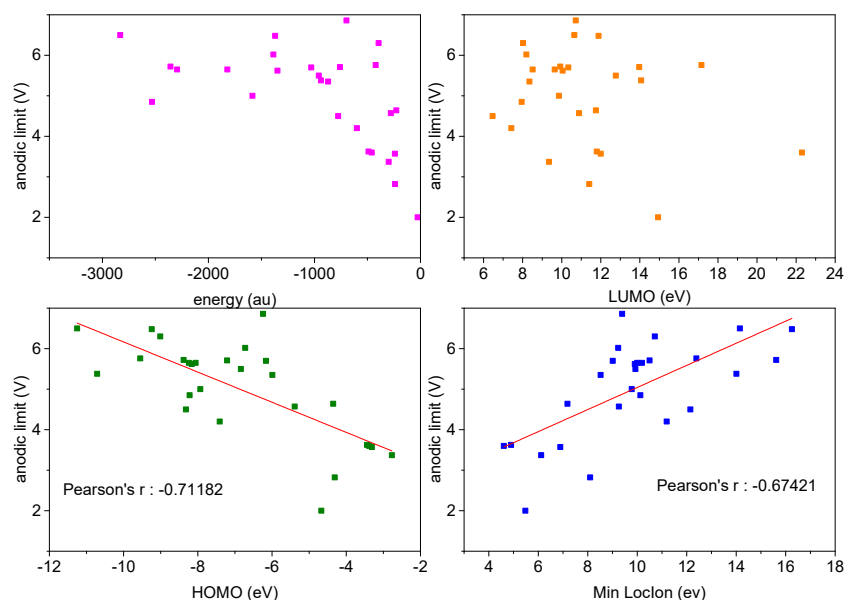

**Figure S1.** Experimental anodic limit versus the energy (in atomic units), LUMO and HOMO levels (in eV) and the minimum of the ionization potential (in eV) calculated at the Hartree-Fock level using the 6-31G\*\* basis set. The red curves are the best fit lines obtained by a linear regression.

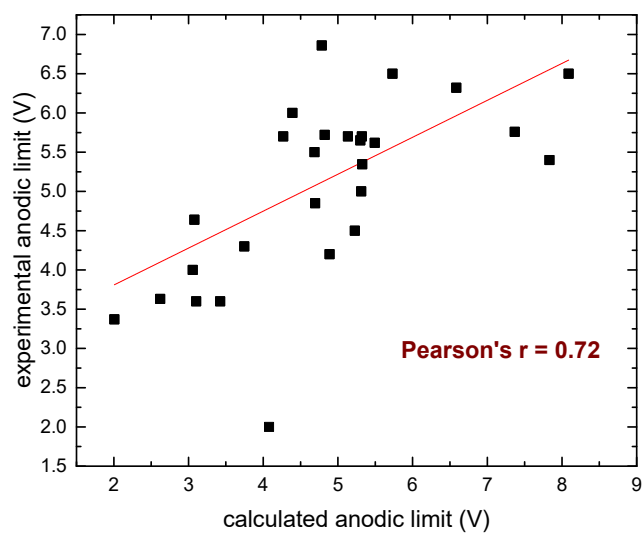

**Figure S2.** Experimental anodic limit versus the anodic limit calculated by means of the empirical model proposed in the text. The red curve is the best fit line obtained by a linear regression.
